# Supplementary material
Source: PubMed Central journal article supplement (PMC3137547)

**Figure 6**

**ATF4 nuclear protein**

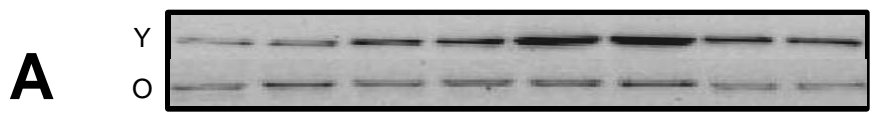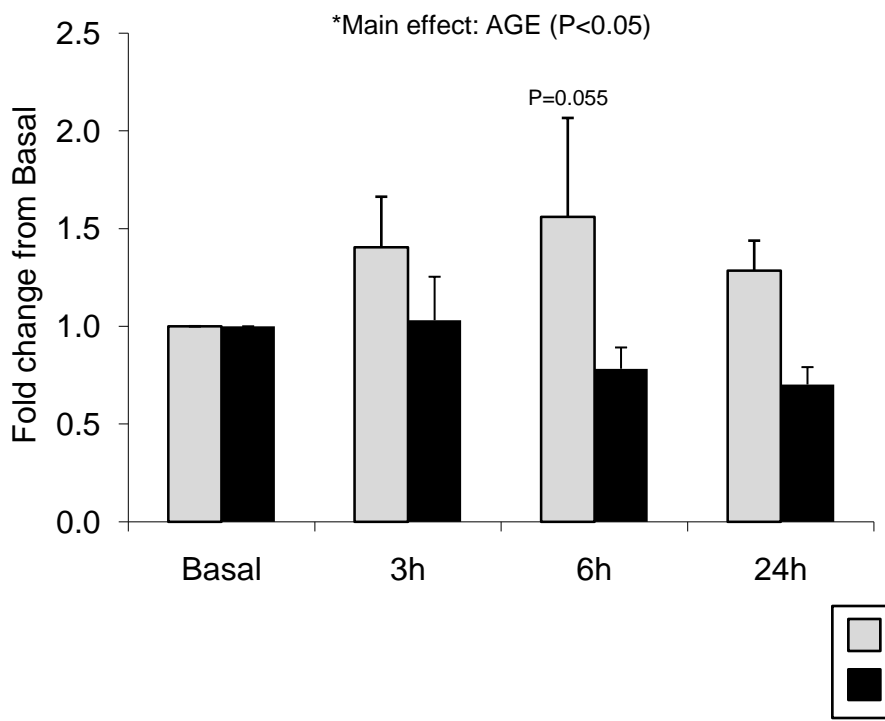

**STAT3 (Y705) nuclear protein**

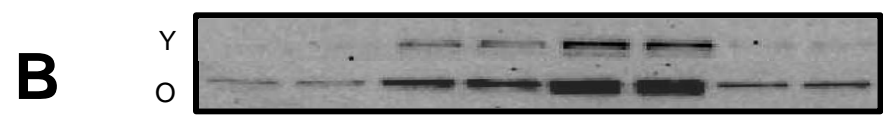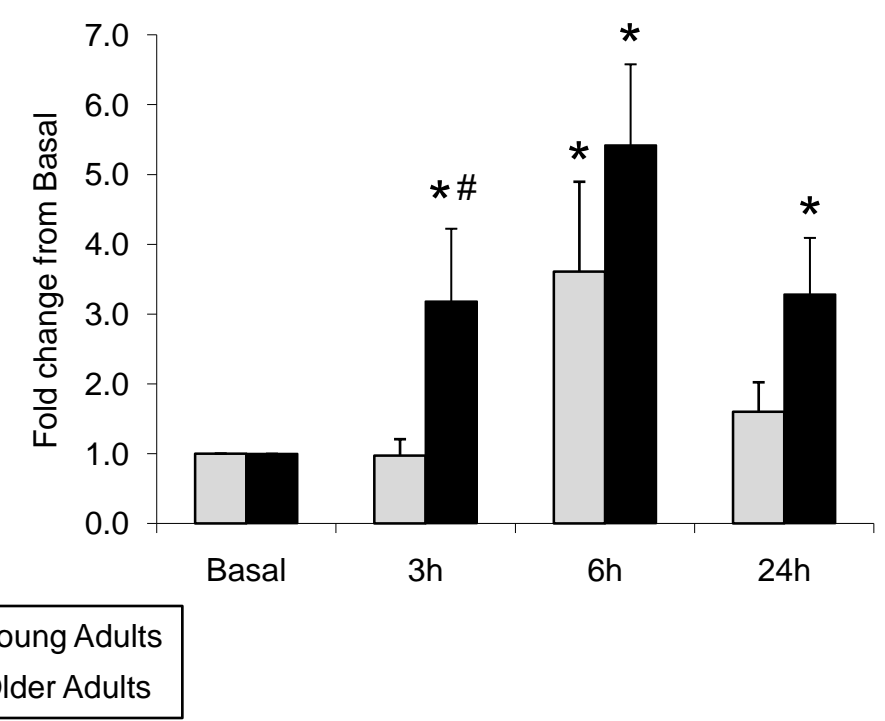

Supplement: supp_japplphysiol.01408.2010_Figure_6.pdf [file supp_japplphysiol.01408.2010_Figure_6.pdf]
